# Supplementary material for: IL-17A impairs host tolerance during airway chronic infection by Pseudomonas aeruginosa
Source: PubMed Central journal article supplement (PMC4870500; doi:10.1038/srep25937), 2016-05-18
Supplement: srep25937-s1.pdf [file srep25937-s1.pdf]

1 **IL-17A impairs host tolerance during airway chronic infection by *Pseudomonas***  
2 ***aeruginosa***

3

4 Nicola Ivan Lorè<sup>1</sup> <sup>✉</sup>\*, Cristina Cigana<sup>1</sup> <sup>✉</sup>, Camilla Riva<sup>1</sup>, Ida De Fino<sup>1</sup>, Alessandro  
5 Nonis<sup>2</sup>, Lorenza Spagnuolo<sup>1</sup>, Barbara Sipione<sup>1</sup>, Lisa Cariani<sup>3</sup>, Daniela Girelli<sup>3</sup>,  
6 Giacomo Rossi<sup>4</sup>, Veronica Basso<sup>6</sup>, Carla Colombo<sup>5</sup>, Anna Mondino<sup>6</sup>, Alessandra  
7 Bragonzi \*

8

9 <sup>1</sup> Infections and Cystic Fibrosis Unit, Division of Immunology, Transplantation and  
10 Infectious Diseases, IRCCS San Raffaele Scientific Institute, Milano, Italy

11 <sup>2</sup> University Center for Statistics in the Biomedical Sciences (CUSBS), Vita-Salute  
12 San Raffaele University, Milano, Italy

13 <sup>3</sup> Cystic Fibrosis Microbiology Laboratory, Fondazione IRCCS Ca' Granda, Ospedale  
14 Maggiore Policlinico, Milano, Italy

15 <sup>4</sup> School of Biosciences and Veterinary Medicine, University of Camerino, Italy

16 <sup>5</sup> Cystic Fibrosis Center, Fondazione IRCCS Ca' Granda, Ospedale Maggiore  
17 Policlinico, Milano, Italy

18 <sup>6</sup> Lymphocytes Activation Unit, Division of Immunology, Transplantation and  
19 Infectious Diseases, IRCCS San Raffaele Scientific Institute, Milano, Italy

20

21

22

23

24

25

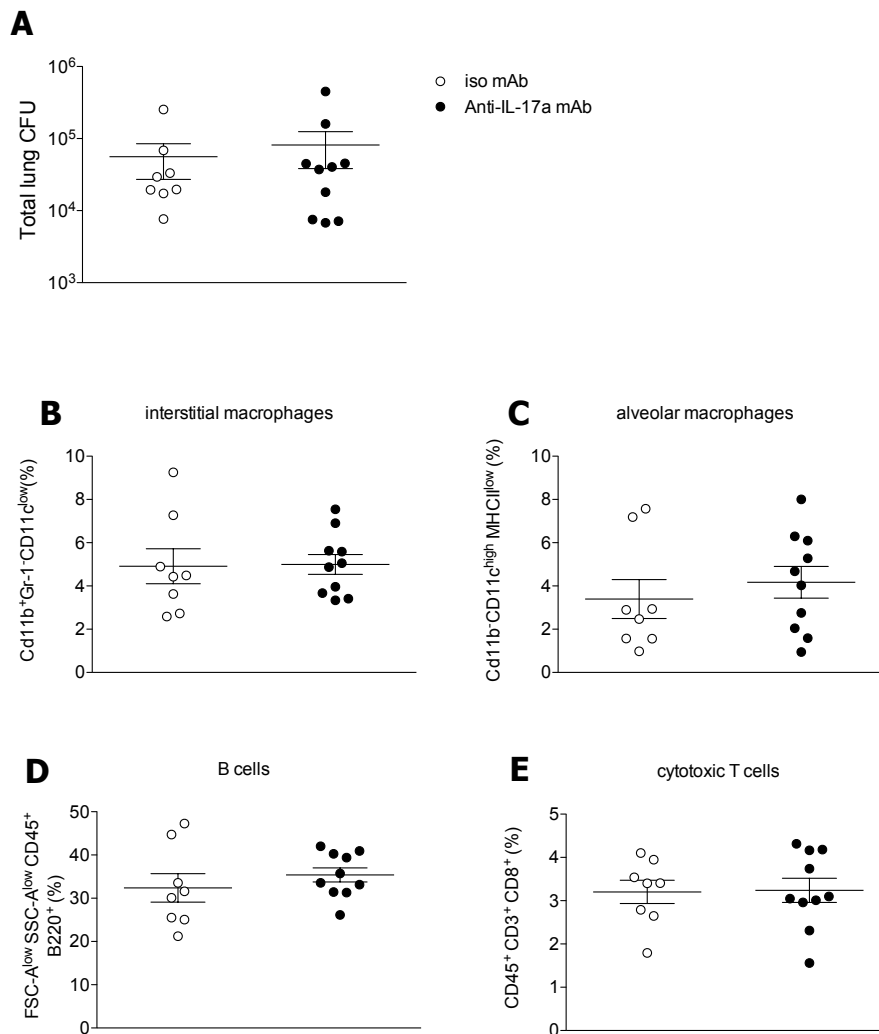

27

28

29 **Fig. S1. *P. aeruginosa* bacterial load and host response in the lung after anti-IL-**  
 30 **17A mAb treatment in the murine model of chronic airways infection.**

31 C57Bl/6NCrIBR mice were infected with 1 to 2x10<sup>6</sup> CFU/lung of the *P. aeruginosa*  
 32 strain AA43 embedded in agar beads. Every three days starting from the tenth day  
 33 from infection, a group of mice was treated i.p. with 100µg/mouse of anti-IL-17A  
 34 mAb, while the other group was treated i.p. with 100µg/mouse of control isotypic IgG  
 35 and analyzed after 28 days of infection. Bacterial load (A), interstitial macrophages  
 36 (B), alveolar macrophages (C), B cells (D) and cytotoxic T cells (E) were measured

37 by flow cytometric analysis in cell suspensions of murine lungs. Dots represent cells  
38 in individual mice, horizontal lines represent mean values and the error bars represent  
39 the SEM. The data are pooled from at least two independent experiments (n=8-10).  
40 Values represent the mean  $\pm$  SEM.

41

42

43

44

45

46

47

48

49

50

51

52

53

54

55

56

57

58

59

60

61

62

63 **Table S1. Characteristics of CF patients enrolled for the study.**

64

| Patients characteristics                                                 | CF patients<br>(n=55) |
|--------------------------------------------------------------------------|-----------------------|
| Age (years)*                                                             | 20,5<br>(5-36,1)      |
| Gender, male (%) <sup>§</sup>                                            | 23<br>(41,8%)         |
| FEV <sub>1</sub> (% predicted)^                                          | 64,3<br>(21,2-120)    |
| F508del/F508del homozygotes (%)                                          | 18<br>(32,7%)         |
| <i>P. aeruginosa</i> only <sup>§</sup>                                   | 15<br>(27%)           |
| <i>P. aeruginosa</i> and other bacteria <sup>§</sup>                     | 33<br>(60%)           |
| Colonized < 2 years by <i>P. aeruginosa</i> <sup>§</sup>                 | 11<br>(20%)           |
| Chronically colonized by <i>P. aeruginosa</i> > 6 years (%) <sup>§</sup> | 26<br>(47,3%)         |
| No <i>P. aeruginosa</i>                                                  | 18<br>(32,7%)         |

65

66 Data are expressed as \* mean, ^ median or <sup>§</sup> positive events.

67

68

69

70

71

72

73

74

75

76

77

78

79

80 **Table S2. Levels of IL-17A, IL-4 and IFN- $\gamma$  in the sera of CF patients**

81 **intermittently or chronically colonized by *P. aeruginosa*.**

|                                | <b>Levels<br/>(mean<math>\pm</math>SEM)</b> | <b>Number of<br/>Patients*</b> |
|--------------------------------|---------------------------------------------|--------------------------------|
| <b>IL-4</b>                    | 11,90 $\pm$ 0,53                            | 27                             |
| <b>IL-17</b>                   | 5,08 $\pm$ 2,11                             | 5                              |
| <b>IFN-<math>\gamma</math></b> | 180,80 $\pm$ 41,47                          | 25                             |

82

83 \* patients in whose sera the marker was detectable (28 patients analyzed)

84

85

86

87

88

89

90

91

92

93

94

95

96

97

98

99

100 **Table S3. Frequencies of T cells subtypes in the spleen of C57Bl/6 mice after 28**  
 101 **days of chronic infection by *P. aeruginosa* AA43 isolate.**

|                                   | 2 days                                        |                                                |                              | 28 days                                       |                                                |                              |
|-----------------------------------|-----------------------------------------------|------------------------------------------------|------------------------------|-----------------------------------------------|------------------------------------------------|------------------------------|
|                                   | Ctrl<br>(mean<br>± SEM;<br>n=6)               | AA43<br>(mean<br>± SEM;<br>n=4)                | Ctrl vs<br>AA43<br>(P value) | Ctrl<br>(mean<br>± SEM;<br>n=4)               | AA43<br>(mean<br>± SEM;<br>n=12)               | Ctrl vs<br>AA43<br>(P value) |
| <b>Total cells</b>                | 8,42x10 <sup>7</sup><br>±1,46x10 <sup>7</sup> | 3,93x10 <sup>7</sup><br>± 7,92x10 <sup>6</sup> | ≥ 0,05                       | 1,2x10 <sup>8</sup><br>± 1,44x10 <sup>7</sup> | 1,11x10 <sup>8</sup><br>± 6,33x10 <sup>6</sup> | ≥ 0,05                       |
| <b>Frequency/CD45<sup>+</sup></b> |                                               |                                                |                              |                                               |                                                |                              |
| <b>CD3<sup>+</sup></b>            | 26,03<br>± 0,78                               | 27,93<br>± 0,69                                | ≥ 0,05                       | 35,33<br>± 1,38                               | 31,4<br>± 1,9                                  | ≥ 0,05                       |
| <b>CD4<sup>+</sup></b>            | 16,37<br>± 0,46                               | 16,7<br>± 0,54                                 | ≥ 0,05                       | 21,64<br>± 0,65                               | 19,51<br>± 1,26                                | ≥ 0,05                       |
| <b>CD8<sup>+</sup></b>            | 8,08<br>± 0,38                                | 9,25<br>± 0,16                                 | ≥ 0,05                       | 11,81<br>± 0,71                               | 10,06<br>± 0,62                                | ≥ 0,05                       |
| <b>Frequency/CD4<sup>+</sup></b>  |                                               |                                                |                              |                                               |                                                |                              |
| <b>IL-17A<sup>+</sup></b>         | 0,47<br>± 0,19                                | 0,28<br>± 0,08                                 | ≥ 0,05                       | 0,51<br>± 0,14                                | 0,54<br>± 0,07                                 | ≥ 0,05                       |
| <b>IFN-γ<sup>+</sup></b>          | 2,13<br>± 0,37                                | 1,25<br>± 0,15                                 | ≥ 0,05                       | 2,34<br>± 0,20                                | 2,46<br>± 0,21                                 | ≥ 0,05                       |
| <b>IL-4<sup>+</sup></b>           | 0,54<br>± 0,14                                | 0,42<br>± 0,10                                 | ≥ 0,05                       | 0,14<br>± 0,08                                | 0,14<br>± 0,03                                 | ≥ 0,05                       |
| <b>Frequency/CD8<sup>+</sup></b>  |                                               |                                                |                              |                                               |                                                |                              |
| <b>IL-17A<sup>+</sup></b>         | 0,22<br>± 0,11                                | 0,13<br>± 0,03                                 | ≥ 0,05                       | 0,09<br>± 0,03                                | 0,12<br>± 0,02                                 | ≥ 0,05                       |
| <b>IFN-γ<sup>+</sup></b>          | 12,54<br>± 2,17                               | 9,67<br>± 1,7                                  | ≥ 0,05                       | 10,21<br>± 1,02                               | 15,86<br>± 2,08                                | ≥ 0,05                       |

102

103

104
